# Supplementary material for: The association between vitamin K intake and dyslipidemia in US adults: the mediating effect of insulin resistance
Source: Royal Society of Chemistry journal article supplement (doi:10.1039/d3fo04614a), 2024-01-01
Supplement: d3fo04614a1.pdf [file d3fo04614a1.pdf]

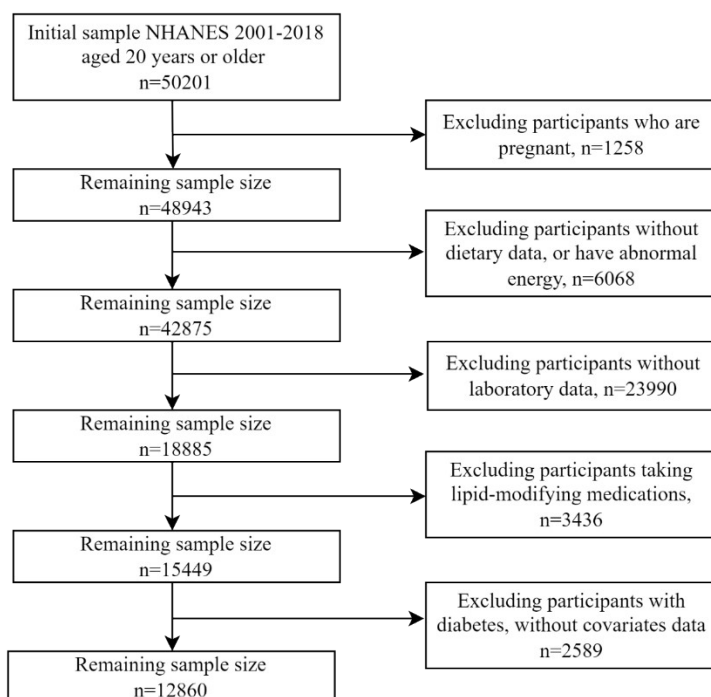

**Figure S1** Flow chart for screening of research subjects

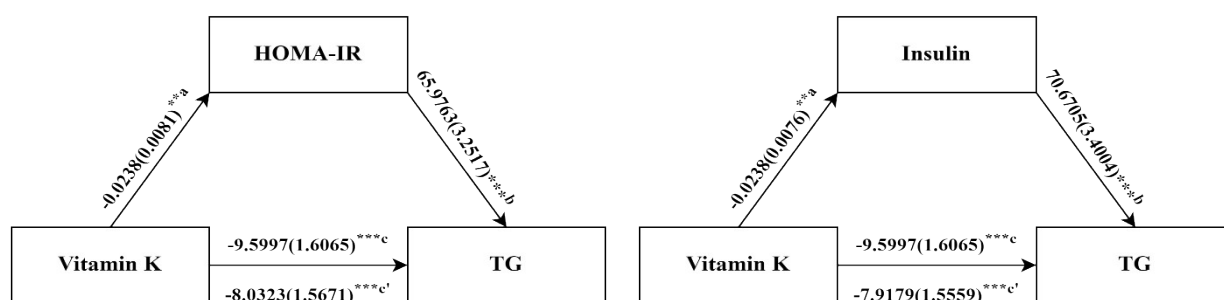

**FigureS2** Regression results of the mediation analysis models. Mediator: HOMA-IR/ insulin;

exposure: vitamin K intake; outcome: TG. Path a assessed the association between mediator and

exposure. Path b measured the effect of mediator on outcome. Path c measured the total effect and

path c' measured the direct effect. The regression coefficient (standard error) was shown on the

paths. Total effect = direct effect + mediated effect(a\*b), there may be minor differences due to the

limitations of the number of decimal places that make the above equation not valid. \*\*\*  $P < 0.001$ ;

\*\*  $P < 0.01$ ; \*  $P < 0.05$

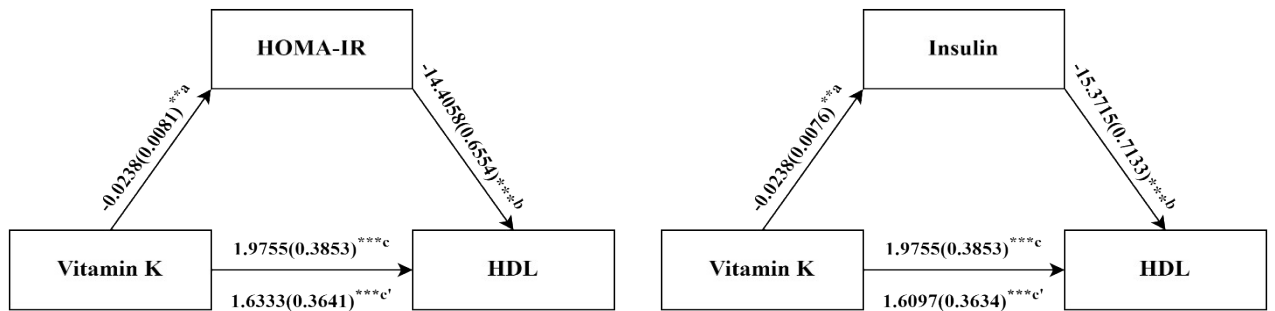

**FigureS3 Regression results of the mediation analysis models.** Mediator: HOMA-IR/ insulin, exposure: vitamin K intake, outcome: HDL. Path a assessed the association between mediator and exposure. Path b measured the effect of mediator on outcome. Path c measured the total effect and path c' measured the direct effect. The regression coefficient (standard error) was shown on the paths. Total effect = direct effect + mediated effect(a\*b), there may be minor differences due to the limitations of the number of decimal places that make the above equation not valid. \*\*\*  $P < 0.001$ ; \*\*  $P < 0.01$ ; \*  $P < 0.05$ .
