# Supplementary material for: The association between vitamin K intake and dyslipidemia in US adults: the mediating effect of insulin resistance
Source: Royal Society of Chemistry journal article supplement (doi:10.1039/d3fo04614a), 2024-01-01
Supplement: d3fo04614a2.pdf [file d3fo04614a2.pdf]

TableS1 Characteristics of the study population by lipid status (Mean (SE)/ n (%))

| Variables             | Total<br>(n=12860) | Dyslipidemia<br>n=5158(39.5) | Normal lipid<br>n=7702(60.5) | $t/\chi^2$ | <i>P</i> |
|-----------------------|--------------------|------------------------------|------------------------------|------------|----------|
| Age, years            |                    |                              |                              | 49.33      | <0.001   |
| 20-39                 | 5339(43.8)         | 1982(40.4)                   | 3357(46.1)                   |            |          |
| 40-59                 | 4389(37.7)         | 1902(41.2)                   | 2487(35.4)                   |            |          |
| ≥60                   | 3132(18.5)         | 1274(18.4)                   | 1858(18.5)                   |            |          |
| Sex                   |                    |                              |                              | 21.85      | 0.001    |
| Male                  | 6322(48.3)         | 2388(45.8)                   | 3934(50.0)                   |            |          |
| Female                | 6538(51.7)         | 2770(54.2)                   | 3768(50.0)                   |            |          |
| Race                  |                    |                              |                              | 32.27      | <0.001   |
| Mexican American      | 2188(8.2)          | 993(9.3)                     | 1195(7.5)                    |            |          |
| Other Hispanic        | 1096(5.3)          | 490(5.7)                     | 606(5.0)                     |            |          |
| Non-Hispanic White    | 5938(69.6)         | 2435(70.0)                   | 3503(69.4)                   |            |          |
| Non-Hispanic Black    | 2482(10.3)         | 825(9.0)                     | 1657(11.1)                   |            |          |
| Other Races           | 1156(6.6)          | 415(6.0)                     | 741(7.0)                     |            |          |
| Educational level     |                    |                              |                              | 62.24      | <0.001   |
| High School and below | 5902(38.6)         | 2632(42.8)                   | 3270(35.9)                   |            |          |
| Above high school     | 6958(61.4)         | 2526(57.2)                   | 4432(64.1)                   |            |          |
| Smoking status        |                    |                              |                              | 51.32      | <0.001   |
| Never                 | 7149(54.6)         | 2724(37.7)                   | 4425(56.2)                   |            |          |
| Former                | 2845(22.9)         | 1119(22.1)                   | 1726(23.4)                   |            |          |
| Current               | 2866(22.5)         | 1315(25.8)                   | 1551(20.4)                   |            |          |
| Drinking status       |                    |                              |                              | 84.52      | <0.001   |
| Never                 | 1647(10.3)         | 699(11.5)                    | 948(9.5)                     |            |          |
| Former                | 2094(14.1)         | 969(17.0)                    | 1125(12.1)                   |            |          |

|                            |                |                |                |        |        |
|----------------------------|----------------|----------------|----------------|--------|--------|
| Current                    | 9119(75.6)     | 3490(71.5)     | 5629(78.4)     |        |        |
| BMI                        |                |                |                | 731.18 | <0.001 |
| < 25.0 kg/m <sup>2</sup>   | 4348(35.5)     | 1140(22.1)     | 3208(44.2)     |        |        |
| 25.0kg/m <sup>2</sup> ≤BMI |                |                |                |        |        |
| <30.0 kg/m <sup>2</sup>    | 4418(33.6)     | 1886(36.8)     | 2532(31.5)     |        |        |
| ≥30.0 kg/m <sup>2</sup>    | 4094(30.9)     | 2132(41.1)     | 1962(24.3)     |        |        |
| Hypertension               | 3295(23.7)     | 1466(27.8)     | 1829(21.0)     | 77.87  | <0.001 |
| Below Vitamin K DRI        | 9338(70.2)     | 3915(74.7)     | 5423(67.3)     | 80.09  | <0.001 |
| IR                         | 3450(24.9)     | 2031(37.7)     | 1419(16.6)     | 732.47 | <0.001 |
| L-insulin                  | 0.93(0.01)     | 1.04(0.01)     | 0.86(0.01)     | 25.44  | <0.001 |
| L-HOMA-IR                  | 0.31(0.01)     | 0.43(0.01)     | 0.24(0.01)     | 25.35  | <0.001 |
| Energy intake, Kcal/day    | 2215.49(11.24) | 2156.68(18.30) | 2253.85(16.29) | 9.89   | <0.001 |

---

BMI: body mass index; DRI: dietary reference intakes; IR: Insulin resistance; L-insulin: log of insulin;

L-HOMA-IR: log of HOMA-IR.

TableS2 The Association of Vitamin K Intake, IR and High TC in US Adults

| Variables                                                                              | Model1   |                 | Model2   |                  | Model3   |                  |
|----------------------------------------------------------------------------------------|----------|-----------------|----------|------------------|----------|------------------|
|                                                                                        | <i>P</i> | OR (95%CI)      | <i>P</i> | OR (95%CI)       | <i>P</i> | OR (95%CI)       |
| Vitamin K intake                                                                       |          |                 |          |                  |          |                  |
| Below DRI                                                                              |          | 1               |          | 1                |          | 1                |
| Met DRI                                                                                | 0.246    | 0.90(0.76,1.07) | 0.035    | 0.83(0.69, 0.99) | 0.114    | 0.87(0.72, 1.04) |
| IR                                                                                     |          |                 |          |                  |          |                  |
| Yes                                                                                    |          | 1               |          | 1                |          | 1                |
| No                                                                                     | 0.615    | 0.96(0.81,1.13) | 0.524    | 0.95(0.80, 1.12) | 0.667    | 0.96(0.79, 1.16) |
| Model1: Vitamin K intake + IR                                                          |          |                 |          |                  |          |                  |
| Model2: Model1+ age +sex + race + education level                                      |          |                 |          |                  |          |                  |
| Model3: Model2 + smoking status + drinking status + hypertension + BMI + energy intake |          |                 |          |                  |          |                  |

TableS3 The Association of Vitamin K intake, IR and High LDL-C in US Adults

| Variables                                                                              | Model1   |                 | Model2   |                  | Model3   |                  |
|----------------------------------------------------------------------------------------|----------|-----------------|----------|------------------|----------|------------------|
|                                                                                        | <i>P</i> | OR (95%CI)      | <i>P</i> | OR (95%CI)       | <i>P</i> | OR (95%CI)       |
| Vitamin K intake                                                                       |          |                 |          |                  |          |                  |
| Below DRI                                                                              |          | 1               |          | 1                |          | 1                |
| Met DRI                                                                                | 0.381    | 0.92(0.75,1.12) | 0.283    | 0.90(0.74, 1.09) | 0.613    | 0.95(0.78, 1.16) |
| IR                                                                                     |          |                 |          |                  |          |                  |
| Yes                                                                                    |          | 1               |          | 1                |          | 1                |
| No                                                                                     | 0.035    | 0.83(0.70,0.99) | 0.054    | 0.84(0.70, 1.00) | 0.427    | 0.92(0.74, 1.14) |
| Model1: Vitamin K intake + IR                                                          |          |                 |          |                  |          |                  |
| Model2: Model1+ age +sex + race + education level                                      |          |                 |          |                  |          |                  |
| Model3: Model2 + smoking status + drinking status + hypertension + BMI + energy intake |          |                 |          |                  |          |                  |
